# Supplementary material
Source: ML conference proceedings conference paper supplement (https://openreview.net/forum?id=QEJxw4hiFn)
Supplement: supplementary_material [file attachment]

# Supplementary Material: Generative Multimodal Data Augmentation for Low-Resource Multimodal Named Entity Recognition

Anonymous Authors

## A DATA STATISTICS

In this section, we report the total number of tweets and entities in the original benchmark datasets and the synthetic datasets generated from GMDA as well as the synthetic datasets generated from mixGen in both low-resource and full-supervision settings.

As shown in Table 1, we can make the following observations. Firstly, the synthetic tweets generated from mixGen and those generated from GMDA are all less than the number of the original training data. The reasons are as follows. For mixGen, we delete tweets that are longer than 50 tokens or that contain more than 10 entities to be more consistent with the distribution of the original dataset. For GMDA, due to the synthetic data filtering strategy, the number of remaining synthetic tweets is much less than the number of training data. Secondly, as the number of samples in the original training set gradually increases, the proportion of retained synthetic tweets also tends to increase, probably because the performance of the base MNER or GMNER model gradually improves. Meanwhile, the Twitter-FMNERG dataset has the fewest retained synthetic tweets, mainly due to the fact that generating accurate fine-grained

**Table 1: Statistics of the three benchmark datasets and synthetic datasets generated from GMDA as well as those generated from mixGen in low-resource and full-supervision settings.**

| Dataset        | The Number of Tweets |         |       |          |        |
|----------------|----------------------|---------|-------|----------|--------|
|                | Prop.                | # Train | # Dev | # mixGen | # GMDA |
| Twitter-2015   | 10%                  | 400     | 100   | 393      | 216    |
|                | 20%                  | 800     | 200   | 792      | 583    |
|                | 40%                  | 1,600   | 400   | 1,571    | 1,221  |
|                | 100%                 | 4,000   | 1,000 | 3,923    | 3,093  |
| Twitter-GMNER  | 10%                  | 700     | 100   | 700      | 367    |
|                | 20%                  | 1,400   | 200   | 1,400    | 716    |
|                | 40%                  | 2,800   | 400   | 2,800    | 1,592  |
|                | 100%                 | 7,000   | 1,000 | 7,000    | 4,084  |
| Twitter-FMNERG | 10%                  | 700     | 100   | 700      | 374    |
|                | 20%                  | 1,400   | 200   | 1,400    | 538    |
|                | 40%                  | 2,800   | 400   | 2,800    | 1,577  |
|                | 100%                 | 7,000   | 1,000 | 7,000    | 2,284  |

  

| Dataset        | The Number of Entities |         |       |          |        |
|----------------|------------------------|---------|-------|----------|--------|
|                | Prop.                  | # Train | # Dev | # mixGen | # GMDA |
| Twitter-2015   | 10%                    | 624     | 146   | 1,637    | 240    |
|                | 20%                    | 1,242   | 304   | 3,292    | 846    |
|                | 40%                    | 2,501   | 617   | 6,707    | 1,800  |
|                | 100%                   | 6,176   | 1,546 | 16,651   | 4,555  |
| Twitter-GMNER  | 10%                    | 1,186   | 244   | 3,341    | 572    |
|                | 20%                    | 2,375   | 484   | 6,305    | 1,117  |
|                | 40%                    | 4,735   | 973   | 12,581   | 2,507  |
|                | 100%                   | 11,779  | 2,450 | 31,731   | 6,355  |
| Twitter-FMNERG | 10%                    | 1,186   | 244   | 3,272    | 596    |
|                | 20%                    | 2,375   | 484   | 6,433    | 847    |
|                | 40%                    | 4,735   | 973   | 12,788   | 2,527  |
|                | 100%                   | 11,779  | 2,450 | 32,128   | 3,330  |

entity labels is much more challenging than generating coarse-grained labels. Lastly, due to the simple concatenation of samples in the mixGen method, the number of entities per tweet significantly increases compared to the original samples. In contrast, the number of entities per tweet generated by GMDA appears closer to the number of entities in the original samples.

## B CASE STUDY AND ERROR ANALYSIS

To better understand the distinction between the synthetic data generated from data augmentation methods and the samples in the original training set, we select several representative synthetic samples generated from GMDA for analysis, as shown in Table 2.

### B.1 Case Study

In case (a), it can be observed that GMDA integrates the *Notch* character from the original image with the *Minecraft* reference from the synthetic sentence, resulting in a cartoon depiction of *Notch* with a rich *Minecraft* style. This fusion effectively conveys the semantic information of both two entities. In case (b), the entity *Oscars*, along with its label, guided the GMDA framework to generate a synthetic sentence related to *Oscars* but different from the original sentence in the semantic content, and the synthetic image conveying the iconic visual characteristics associated with the Academy Awards. Based on GMDA, we obtained a synthetic text-image pair that only shares the same named entities with the original tweet but is semantically different.

### B.2 Error Analysis

Additionally, we have observed that some synthetic data contains errors, which may introduce noise to the model training in downstream tasks. Most of these error cases can be generally categorized into the following two groups:

- **The loss of semantic information.** For example, in case (c), based on the synthetic text, we can infer that the Multimodal Text Generation stage in GMDA correctly identifies *Pluto* as a cartoon character from Disney. However, during the Multimodal Image Generation stage, the model did not accurately generate the associated image of *Pluto*; instead, it generated a cartoon dog based on the synthetic sentence’s description.
- **Fabricating non-existent entities.** For example, in case (d), the pyramid of *Egypt* in the original tweet is an analogy for the *Jim Beam American Stillhouse*, which is a stillhouse associated with the American brand Jim Beam. However, the synthetic image incorrectly combines *Egypt* and the *Jim Beam American Stillhouse*, fabricating a structure incorporating features of both entities.

**Table 2: Comparison between the original samples and the synthetic samples generated from GMDA.**

| Original Samples                                                                                                                                                                                                                          |                                                                                   | Synthetic Samples                                                                                                                                                |                                                                                   | Original Samples                                                                                                                                                                                                                                       |                                                                                    | Synthetic Samples                                                                                                                                             |                                                                                     |
|-------------------------------------------------------------------------------------------------------------------------------------------------------------------------------------------------------------------------------------------|-----------------------------------------------------------------------------------|------------------------------------------------------------------------------------------------------------------------------------------------------------------|-----------------------------------------------------------------------------------|--------------------------------------------------------------------------------------------------------------------------------------------------------------------------------------------------------------------------------------------------------|------------------------------------------------------------------------------------|---------------------------------------------------------------------------------------------------------------------------------------------------------------|-------------------------------------------------------------------------------------|
| (a)                                                                                                                                                                                                                                       |  |                                                                                                                                                                  |  | (b)                                                                                                                                                                                                                                                    |  |                                                                                                                                                               |  |
| RT @WiredUK : [ <b>Minecraft, OTHER</b> ] creator [ <b>Notch, PER</b> ] says his billions have made him miserable <a href="http://t.co/wMnoZp2hLv">http://t.co/wMnoZp2hLv</a> <a href="http://t.co/iUogGT6d3N">http://t.co/iUogGT6d3N</a> |                                                                                   | RT @Joy vs Suffer : [ <b>Minecraft, OTHER</b> ] icon [ <b>Notch, PER</b> ] is the king of the world! <a href="http://t.co/jj7Bjtwj1g">http://t.co/jj7Bjtwj1g</a> |                                                                                   | RT @CBSunday : What treasures worth at least \$ 125K will be gifted to the losers at the [ <b>Oscars, OTHER</b> ] ? <a href="http://t.co/xlb10CnwQZ">http://t.co/xlb10CnwQZ</a> <a href="http://t.co/WhiIRub240">http://t.co/WhiIRub240</a>            |                                                                                    | RT @adelesnor : We are #Handbag-Bad at the [ <b>Oscars, OTHER</b> ] booth. <a href="http://t.co/LXR4mJjQew">http://t.co/LXR4mJjQew</a>                        |                                                                                     |
| (c)                                                                                                                                                                                                                                       |  |                                                                                                                                                                  |  | (d)                                                                                                                                                                                                                                                    |  |                                                                                                                                                               |  |
| RT @steventurous : This [ <b>Pluto, OTHER</b> ] image is really stunning . <a href="http://t.co/P3bjN0v46h">http://t.co/P3bjN0v46h</a>                                                                                                    |                                                                                   | RT @DisneyLikesPluto : My [ <b>Pluto, OTHER</b> ] is a dog. <a href="http://t.co/kUyNa2syvkD">http://t.co/kUyNa2syvkD</a>                                        |                                                                                   | RT @JimBeam : [ <b>Egypt, LOC</b> ] has pyramids , we have rackhouses . Visit the [ <b>Jim Beam American Stillhouse, LOC</b> ] <a href="http://t.co/2tvkUNKPji">http://t.co/2tvkUNKPji</a> <a href="http://t.co/dOro4Misls">http://t.co/dOro4Misls</a> |                                                                                    | RT @bourbonstories : From [ <b>Egypt, LOC</b> ] to [ <b>Jim Beam American Stillhouse, LOC</b> ] : <a href="http://t.co/ogfopQhF9V">http://t.co/ogfopQhF9V</a> |                                                                                     |
